# Supplementary material for: Chemical characterization of Punta de Fuencaliente CO 2 seeps system (La Palma Island, NE Atlantic Ocean): a new natural laboratory for ocean acidification studies
Source: Copernicus journal article supplement (doi:10.5194/bg-2020-232), 2020-08-03
Supplement: Supplementary file 1 [file SM2_Chemistry data_Fuencaliente.xlsx]

## Sheet: Hoja1
Date	Location	Tide	Latitude	Longitude	Depth(m)	Temp (ºC)	Salinity	CT	AT	pH	fCO2	Ωcal	Ωara
2018-03-01	Faro	Low	28.456	-17.8454	2	18.7	36.713	2800.44	2888.12	7.62112	1505.64	2.32291	1.5081
2018-03-01	Faro	Low	28.456	-17.8453	2	18.64	36.802	3030.11	3070.14	7.50178	2149.18	1.91293	1.24185
2018-03-01	Faro	Low	28.456	-17.8451	2	18.64	36.812	2906.03	2973.27	7.56892	1763.96	2.13927	1.3888
2018-03-01	Faro	Low	28.456	-17.845	2	18.64	36.852	2810.71	2911.07	7.64964	1412.45	2.48572	1.61377
2018-03-01	Faro	Low	28.456	-17.8447	2	18.67	36.58	3121.96	3193.85	7.57567	1866.77	2.32891	1.51168
2018-03-01	Faro	Low	28.4559	-17.8447	2	18.73	36.821	2827.75	2912.35	7.61134	1555.43	2.30017	1.49361
2018-03-01	Faro	Low	28.4558	-17.8451	2	18.73	36.873	2757.65	2860.64	7.65682	1363.17	2.4876	1.61539
2018-03-01	Faro	Low	28.4557	-17.8449	2	18.97	36.732	2642.12	2771.9	7.72213	1121.04	2.77867	1.80525
2018-03-01	Faro	Low	28.4558	-17.8454	2	18.88	36.944	2673.45	2819.23	7.75352	1051.72	3.01376	1.95794
2018-03-01	Faro	Low	28.4556	-17.8452	2	18.82	36.831	2761.43	2867.02	7.66173	1350.12	2.52573	1.64046
2018-03-01	Faro	Low	28.4555	-17.8452	2	19.06	37.001	2501.15	2686.08	7.84408	792.399	3.46855	2.25455
2018-03-01	Faro	Low	28.4558	-17.8456	2	19.21	37.02	2380.12	2608.44	7.93455	605.479	4.04079	2.62755
2018-03-01	Faro	Low	28.4558	-17.8454	2	19.06	36.951	2565.25	2738.61	7.81599	869.72	3.3425	2.17252
2018-03-01	Faro	Low	28.4558	-17.8444	2	19.12	36.842	2813.03	2897.68	7.60647	1568.33	2.29703	1.49307
2018-03-01	Faro	Low	28.4556	-17.8442	2	18.85	36.892	2919.33	2987.32	7.56682	1782.53	2.15813	1.40189
2018-03-01	Faro	Low	28.4554	-17.844	2	18.88	36.895	2915.14	3014.29	7.63835	1506.08	2.53732	1.64834
2018-03-01	Faro	Low	28.4557	-17.8446	2	19.29	36.822	2738.73	2854.58	7.67964	1286.81	2.65344	1.72546
2018-03-01	Faro	Low	28.4554	-17.8446	2	19.15	36.975	2519.06	2700.66	7.83487	816.383	3.4336	2.23229
2018-03-01	Faro	Low	28.4551	-17.8445	2	19.32	37.059	2243.87	2498.41	7.99368	493.608	4.34313	2.82505
2018-03-01	Faro	Low	28.4556	-17.845	2	19.35	36.857	2554.95	2726.43	7.80989	880.4	3.31552	2.15639
2018-03-01	Faro	Low	28.4554	-17.8448	2	19.44	37.12	2410.47	2682.97	7.99978	522.415	4.75008	3.09088
2018-03-01	Faro	Low	28.4552	-17.8443	2	19.35	37.009	2444.03	2649.53	7.88444	703.014	3.7409	2.4334
2018-03-01	Faro	Low	28.4539	-17.8465	3	19.41	36.894	2132.13	2418.39	8.06051	397.446	4.75849	3.09548	CONTROL
2018-12-01	Faro	High	28.456	-17.8455	1	20.67	36.998	2512.35	2692.13	7.79594	904.07	3.43857	2.25009
2018-12-01	Faro	High	28.456	-17.8452	1	20.67	37	2428.18	2645.59	7.8747	721.833	3.946	2.58215
2018-12-01	Faro	High	28.4552	-17.8447	1	20.67	36.999	2120.1	2415.15	8.04156	416.952	4.91486	3.21614
2018-12-01	Faro	High	28.4553	-17.8441	1	20.67	37.032	2199.2	2472.54	7.99635	484.285	4.63803	3.03508
2018-12-01	Faro	High	28.4554	-17.8443	1	20.67	37.044	2167.52	2450.06	8.01504	455.526	4.7555	3.11199
2018-12-01	Faro	High	28.4559	-17.8444	1	20.67	37.023	2400	2606.05	7.85675	745.314	3.75235	2.45548
2018-12-01	Faro	High	28.4557	-17.8441	1	20.67	37.019	2270	2535.84	7.97527	526.815	4.57771	2.99557
2018-12-01	Faro	High	28.4554	-17.8439	1	20.67	37.02	2273.23	2523.5	7.94924	562.713	4.3372	2.83819
2018-12-01	Faro	High	28.4554	-17.8445	1	20.67	37.028	2125.62	2419.74	8.03902	420.669	4.90322	3.2086
2018-12-01	Faro	High	28.4556	-17.8443	1	20.67	37.003	2261.71	2513.16	7.95283	554.934	4.34756	2.84492
2018-12-01	Faro	High	28.4557	-17.8446	1	20.67	37.012	2269.57	2519.92	7.94992	560.875	4.33609	2.83744
2018-12-01	Faro	High	28.456	-17.8448	1	20.67	37.024	2405.12	2623.51	7.87867	708.04	3.94338	2.58049
2018-12-01	Faro	High	28.4555	-17.8449	1	20.67	37.035	2123.36	2416.66	8.03798	421.307	4.88782	3.19855
2018-12-01	Faro	High	28.4559	-17.8455	1	20.67	37.01	2196.12	2478.6	8.01147	465.729	4.78032	3.12813
2018-12-01	Faro	High	28.4559	-17.8453	1	20.67	37.029	2286	2539.53	7.95299	560.628	4.39711	2.87742
2018-12-01	Faro	High	28.4558	-17.845	1	20.67	37	2287.68	2535	7.94275	575.478	4.30364	2.81617
2018-12-01	Faro	High	28.4557	-17.8453	1	20.67	37.023	2150.06	2450.28	8.04491	419.257	5.02074	3.2855
2018-12-01	Faro	Low	28.4557	-17.8453	1	21.5646	36.953	2477.12	2653.1	7.79216	899.658	3.36045	2.19888
2018-12-01	Faro	Low	28.4559	-17.8453	1	21.5646	36.926	2552.96	2700.04	7.72662	1085.09	2.99585	1.96026
2018-12-01	Faro	Low	28.4558	-17.845	1	21.523	36.885	2632.88	2747.63	7.65046	1341.06	2.60563	1.70486
2018-12-01	Faro	Low	28.4559	-17.8455	1	21.5646	36.9	2661.08	2777.69	7.65282	1347.85	2.648	1.73261
2018-12-01	Faro	Low	28.4556	-17.8443	1	21.523	36.9	2639.13	2761.49	7.66703	1292.54	2.71107	1.77387
2018-12-01	Faro	Low	28.4557	-17.8446	1	21.523	36.718	3069.43	3056.81	7.33975	3214.72	1.48951	0.974417
2018-12-01	Faro	Low	28.4555	-17.8449	1	21.5646	36.982	2257.46	2504.44	7.94607	563.266	4.27613	2.79813
2018-12-01	Faro	Low	28.4554	-17.8445	1	21.523	37.017	2165.34	2460.64	8.03538	432.482	4.95637	3.24336
2018-12-01	Faro	Low	28.4552	-17.8447	1	21.5646	37.014	2229.52	2454.03	7.90976	608.253	3.90858	2.55769
2018-12-01	Faro	Low	28.4554	-17.8443	1	21.523	36.884	2758.68	2836.53	7.55829	1744.91	2.21761	1.45098
2018-12-01	Faro	Low	28.4553	-17.8441	1	21.523	36.87	2738.35	2830.95	7.59408	1592.86	2.38662	1.56154
2018-12-01	Faro	Low	28.4554	-17.8439	1	21.523	36.794	2814.75	2901.89	7.57889	1696.95	2.36801	1.54924
2018-12-01	Faro	Low	28.4557	-17.8441	1	21.523	36.718	3124.23	3112.26	7.34273	3249.94	1.52669	0.99874
2018-12-01	Faro	Low	28.4559	-17.8444	1	21.523	36.649	3355.03	3262.55	7.17789	5060.17	1.11142	0.727027
2018-12-01	Faro	Low	28.456	-17.8448	1	21.523	36.511	3663.67	3550.62	7.15909	5763.14	1.1583	0.757576
2018-12-01	Faro	Low	28.456	-17.8452	1	21.5646	36.653	3294.34	3301.34	7.38973	3078.66	1.79384	1.17343
2018-12-01	Faro	Low	28.456	-17.8455	1	21.5646	36.598	3776.65	3689.23	7.21032	5295.11	1.35735	0.888195
2018-12-01	Faro Salinas	Low	28.4547	-17.8439	1	21.523	37.043	2170.84	2452	8.012	459.2	4.74	3.1	CONTROL
2018-12-01	Faro Salinas	Low	28.4549	-17.8436	1	21.523	37.05	2160.96	2446	8.02	448.9	4.79	3.13	CONTROL
2019-06-01	Faro	High	28.456	-17.8455	1	21.9	36.5	NA	NA	7.78168	NA	NA	NA
2019-06-01	Faro	High	28.456	-17.8452	1	22.1	36.5	NA	NA	7.85208	NA	NA	NA
2019-06-01	Faro	High	28.4559	-17.8444	1	22.2	36.5	NA	NA	7.6953	NA	NA	NA
2019-06-01	Faro	High	28.4559	-17.8455	1	22.2	36.5	NA	NA	7.76048	NA	NA	NA
2019-06-01	Faro	High	28.4559	-17.8453	1	22.1	36.5	NA	NA	7.93971	NA	NA	NA
2019-06-01	Faro	High	28.4558	-17.845	1	21.9	36.5	NA	NA	7.88739	NA	NA	NA
2019-06-01	Faro	High	28.4557	-17.8441	1	22	36.5	NA	NA	7.86045	NA	NA	NA
2019-06-01	Faro	High	28.4556	-17.8443	1	22	36.5	NA	NA	7.90292	NA	NA	NA
2019-06-01	Faro	High	28.4554	-17.8439	1	22	36.5	NA	NA	7.92723	NA	NA	NA
2019-06-01	Faro	High	28.4553	-17.8441	1	22.1	36.5	NA	NA	7.93175	NA	NA	NA
2019-06-01	Faro	High	28.4552	-17.8447	1	22.2	36.5	NA	NA	8.07561	NA	NA	NA
2019-06-01	Faro	Low	28.4554	-17.8439	1	NA	36.5	NA	NA	7.83858	NA	NA	NA
2019-06-01	Faro	Low	28.4553	-17.8441	1	NA	36.5	NA	NA	7.78744	NA	NA	NA
2019-06-01	Faro	Low	28.4556	-17.8443	1	NA	36.5	NA	NA	7.62751	NA	NA	NA
2019-06-01	Faro	Low	28.4557	-17.8441	1	NA	36.5	NA	NA	7.59832	NA	NA	NA
2019-06-01	Faro	Low	28.4552	-17.8447	1	NA	36.5	NA	NA	7.98791	NA	NA	NA
2019-06-01	Faro	Low	28.4558	-17.845	1	NA	36.5	NA	NA	7.56657	NA	NA	NA
2019-06-01	Faro	Low	28.4559	-17.8453	1	NA	36.5	NA	NA	7.73451	NA	NA	NA
2019-06-01	Faro	Low	28.4559	-17.8455	1	NA	36.5	NA	NA	7.61206	NA	NA	NA
2019-06-01	Faro	Low	28.456	-17.8455	1	NA	36.5	NA	NA	7.23237	NA	NA	NA
2019-06-01	Faro	Low	28.456	-17.8452	1	NA	36.5	NA	NA	7.777	NA	NA	NA
2019-06-01	Faro	Low	28.4559	-17.8444	1	NA	36.5	NA	NA	7.12626	NA	NA	NA
2018-03-01	Barqueros	Low	28.4567	-17.8472	2	18.64	36.35	3794.01	3664.02	7.17017	5706.01	1.09482	0.710407
2018-03-01	Barqueros	Low	28.4566	-17.8473	2	18.64	37.072	2617.53	2773.99	7.78224	960.078	3.12247	2.02758
2018-03-01	Barqueros	Low	28.4566	-17.8472	2	18.64	37.063	2591.61	2787.46	7.8619	784.873	3.68344	2.39182
2018-03-01	Barqueros	Low	28.4567	-17.847	2	18.64	37.051	2943.57	3070.78	7.69942	1314.78	2.91917	1.89553
2018-03-01	Barqueros	Low	28.4564	-17.8471	2	18.64	37.07	2404.96	2627.36	7.92926	618.32	3.95754	2.56982
2018-12-01	Barqueros	Low	28.4567	-17.8472	1	21.5646	36.757	3097.99	3151.8	7.495	2271.9	2.15	1.41
2018-12-01	Barqueros	Low	28.4566	-17.8477	1	21.57	37.018	2260	2526.3	7.977	521.9	4.58	3
2018-12-01	Barqueros	Low	28.4564	-17.8489	1	21.57	37.032	2128.78	2419.2	8.033	428	4.85	3.17	CONTROL
2018-12-01	Barqueros	Low	28.4569	-17.8488	1	21.57	37.045	2130.68	2424.6	8.038	423	4.9	3.21	CONTROL
2018-12-01	Barqueros	Low	28.456	-17.8462	1	21.57	36.976	2313.8	2546.5	7.915	623.8	4.1	2.68
2018-12-01	Barqueros	Low	28.4564	-17.8484	1	21.57	36.957	2460	2636.1	7.794	889.5	3.35	2.19
2018-12-01	Barqueros	Low	28.4566	-17.8472	1	21.57	36.952	2458.4	2642.7	7.81	854.6	3.47	2.27
2018-12-01	Barqueros	Low	28.4565	-17.8472	1	21.523	36.62	3456.6	3410.6	7.279	4152.8	1.45	0.95
2018-12-01	Barqueros	Low	28.4567	-17.847	1	21.57	36.754	3049.4	3085.7	7.455	2453.3	1.93	1.26
2018-12-01	Barqueros	Low	28.4567	-17.8471	1	21.57	36.842	2833.3	2940.7	7.623	1538.6	2.64	1.73
2018-12-01	Barqueros	Low	28.456	-17.8459	1	21.523	36.079	3110	3103.3	7.359	3119.9	1.57	1.02
2018-12-01	Barqueros	Low	28.4563	-17.8462	1	21.5646	36.8	2952.8	3003.2	7.489	2195.6	2.02	1.32
2018-12-01	Barqueros	Low	28.4566	-17.8467	1	21.5646	36.829	2824.8	2900.8	7.552	1813	2.24	1.46
2018-12-01	Barqueros	Low	28.4565	-17.8474	1	21.57	36.94	2444.6	2645.2	7.843	785.6	3.7	2.42
2018-12-01	Barqueros	High	28.4566	-17.8472	1	NA	37.015	2136.2	2426	8.031	431.3	4.85	3.17
2018-12-01	Barqueros	High	28.4566	-17.8472	1	NA	37.023	2151.8	2439.4	8.025	440.8	4.82	3.16
2018-12-01	Barqueros	High	28.4566	-17.8473	1	NA	37.15	2189.2	2468.7	8.006	470.4	4.72	3.09
2018-12-01	Barqueros	High	28.456	-17.8462	1	NA	37.007	2214.3	2487.9	7.995	489.1	4.66	3.05
2018-12-01	Barqueros	High	28.4562	-17.8461	1	NA	36.998	2282.7	2537	7.955	557	4.41	2.88
2018-12-01	Barqueros	High	28.4564	-17.8463	1	NA	37.011	2314.5	2563.2	7.942	583.5	4.35	2.84
2018-12-01	Barqueros	High	28.4566	-17.8467	1	NA	36.995	2359.4	2600.1	7.923	622.9	4.26	2.78
2018-12-01	Barqueros	High	28.4567	-17.8472	1	NA	37	2369.5	2611.3	7.924	624.7	4.28	2.8
2018-12-01	Barqueros	High	28.4567	-17.847	1	NA	37	2445.5	2672.3	7.889	701.3	4.1	2.68
2018-12-01	Barqueros	High	28.4567	-17.8471	1	NA	36.946	2504.8	2723.4	7.869	754.5	4.02	2.63
2018-03-01	Echentive 1	Low	28.4603	-17.8522	1	18.7	31.35	10784.8	10817.1	7.51737	7522.72	6.48754	4.16995
2018-03-01	Echentive 1	Low	28.4603	-17.8523	1	18.64	31.458	10493.9	10448.6	7.45417	8455.3	5.45298	3.50549
2018-03-01	Echentive 1	Low	28.4603	-17.8523	1	18.55	31.783	10338.1	10286.8	7.44703	8449.4	5.29563	3.4065
2018-03-01	Echentive 1	Low	28.4603	-17.8523	1	18.61	31.583	10006.2	9873.19	7.37702	9603.86	4.34958	2.79688
2018-03-01	Echentive 1	Low	28.4602	-17.8522	1	18.58	31.772	9702.74	9688.18	7.47501	7439.73	5.30798	3.4146
2018-03-01	Echentive 1	Low	28.4602	-17.8521	1	18.73	31.687	10667.8	10639.4	7.46571	8367.2	5.73655	3.69084
2018-03-01	Echentive 1	Low	28.4602	-17.8521	1	18.64	31.527	10580.8	10560.4	7.47413	8141.66	5.76526	3.70692
2018-03-01	Echentive 1	Low	28.4602	-17.8522	1	18.94	32.025	9611.83	9608.28	7.47786	7330.18	5.39106	3.47336
2018-12-01	Echentive 1	Low	28.4602	-17.8521	1	NA	NA	NA	NA	7.58592	NA	NA	NA
2018-12-01	Echentive 1	Low	28.4602	-17.8521	1	NA	NA	NA	NA	7.55481	NA	NA	NA
2018-12-01	Echentive 1	Low	28.4603	-17.8521	1	NA	NA	NA	NA	7.54616	NA	NA	NA
2018-12-01	Echentive 1	Low	28.4603	-17.8522	1	NA	NA	NA	NA	7.53059	NA	NA	NA
2018-12-01	Echentive 1	Low	28.4603	-17.8523	1	NA	NA	NA	NA	7.50808	NA	NA	NA
2018-12-01	Echentive 1	Low	28.4603	-17.8523	1	NA	NA	NA	NA	7.53059	NA	NA	NA
2018-12-01	Echentive 1	Low	28.4603	-17.8524	1	NA	NA	NA	NA	7.52539	NA	NA	NA
2018-12-01	Echentive 1	Low	28.4603	-17.8523	1	NA	NA	NA	NA	7.53059	NA	NA	NA
2018-12-01	Echentive 1	Low	28.4602	-17.8523	1	NA	NA	NA	NA	7.53751	NA	NA	NA
2018-12-01	Echentive 1	Low	28.4602	-17.8522	1	NA	NA	NA	NA	7.52193	NA	NA	NA
2018-12-01	Echentive 1	High	28.4602	-17.8521	1	NA	NA	NA	NA	7.55308	NA	NA	NA
2018-12-01	Echentive 1	High	28.4602	-17.8521	1	NA	NA	NA	NA	7.51847	NA	NA	NA
2018-12-01	Echentive 1	High	28.4603	-17.8521	1	NA	NA	NA	NA	7.50462	NA	NA	NA
2018-12-01	Echentive 1	High	28.4603	-17.8522	1	NA	NA	NA	NA	7.51328	NA	NA	NA
2018-12-01	Echentive 1	High	28.4603	-17.8523	1	NA	NA	NA	NA	7.38678	NA	NA	NA
2018-12-01	Echentive 1	High	28.4603	-17.8523	1	NA	NA	NA	NA	7.38331	NA	NA	NA
2018-12-01	Echentive 1	High	28.4603	-17.8524	1	NA	NA	NA	NA	7.51155	NA	NA	NA
2018-12-01	Echentive 1	High	28.4603	-17.8523	1	NA	NA	NA	NA	7.50635	NA	NA	NA
2018-12-01	Echentive 1	High	28.4602	-17.8523	1	NA	NA	NA	NA	7.53924	NA	NA	NA
2018-12-01	Echentive 1	High	28.4602	-17.8522	1	NA	NA	NA	NA	7.52539	NA	NA	NA
2018-12-01	Echentive 2	Low	28.46	-17.8513	1	NA	NA	NA	NA	7.55999	NA	NA	NA
2018-12-01	Echentive 2	Low	28.46	-17.8514	1	NA	NA	NA	NA	7.59283	NA	NA	NA
2018-12-01	Echentive 2	Low	28.46	-17.8515	1	NA	NA	NA	NA	7.61009	NA	NA	NA
2018-12-01	Echentive 2	Low	28.4599	-17.8515	1	NA	NA	NA	NA	7.57555	NA	NA	NA
2018-12-01	Echentive 2	Low	28.4599	-17.8514	1	NA	NA	NA	NA	7.58937	NA	NA	NA
2018-12-01	Echentive 2	Low	28.4599	-17.8515	1	NA	NA	NA	NA	7.63252	NA	NA	NA
2018-12-01	Echentive 2	High	28.46	-17.8513	1	NA	NA	NA	NA	7.52886	NA	NA	NA
2018-12-01	Echentive 2	High	28.46	-17.8514	1	NA	NA	NA	NA	7.50462	NA	NA	NA
2018-12-01	Echentive 2	High	28.46	-17.8514	1	NA	NA	NA	NA	7.52193	NA	NA	NA
2018-12-01	Echentive 2	High	28.46	-17.8515	1	NA	NA	NA	NA	7.51847	NA	NA	NA
2018-12-01	Echentive 2	High	28.4599	-17.8515	1	NA	NA	NA	NA	7.63425	NA	NA	NA
2018-12-01	Echentive 2	High	28.4599	-17.8515	1	NA	NA	NA	NA	7.63597	NA	NA	NA
2019-06-01	Echentive 1	Low	28.4603	-17.8523	1	27.3	31	NA	NA	7.29896	NA	NA	NA
2019-06-01	Echentive 1	Low	28.4602	-17.8523	1	27.4	31	NA	NA	7.25438	NA	NA	NA
2019-06-01	Echentive 1	Low	28.4603	-17.8521	1	25.9	31	NA	NA	7.2907	NA	NA	NA
2019-06-01	Echentive 1	Low	28.4602	-17.8522	1	25.9	31	NA	NA	7.31543	NA	NA	NA
2019-06-01	Echentive 1	Low	28.4601	-17.8521	1	25.8	31	NA	NA	7.32108	NA	NA	NA
2019-06-01	Echentive 1	Low	28.4603	-17.8522	1	26.1	31	NA	NA	7.33608	NA	NA	NA
